# Supplementary material
Source: PubMed Central journal article supplement (PMC4787859)
Supplement: yatj704460.ww2_default.pdf [file yatj704460.ww2_default.pdf]

## Appendix 2: Negative comments in the academic reference [posted as supplied by author]

The list below was provided to the three experienced admissions staff at Nottingham who reviewed the academic references, They were asked to highlight any comments that they found, then to grade them as likely to have a potentially minor, moderate or major effect on the student's progress on the course. This checklist was used in our previous work on Struggling students<sup>11</sup> and the unpublished pilot for this study.

| <b>Negative comments in Academic references</b>                                                                            |                                   |
|----------------------------------------------------------------------------------------------------------------------------|-----------------------------------|
| The following categories of negative comments have been identified, with some examples given of the type of comment noted. |                                   |
| Please view this only as a general guide and use your own discretion & experience.                                         |                                   |
| <b>Academic aspects</b>                                                                                                    |                                   |
| insufficient work                                                                                                          | lack of self-discipline           |
| slow to grasp new concepts                                                                                                 | careless                          |
| takes short cuts                                                                                                           | lacking in accuracy               |
| lack of independent thought                                                                                                | conceptual difficulties           |
| lack of focus                                                                                                              | unwilling to take academic risks  |
| excess social activities                                                                                                   | poor motivation                   |
| finds A level work demanding/challenging                                                                                   | disorganized, deadlines not met   |
| language problems                                                                                                          |                                   |
| <b>Personality - introversion</b>                                                                                          |                                   |
| reserved during lessons                                                                                                    | lacking in confidence             |
| self-effacing                                                                                                              | not confident in novel situations |
| reticent                                                                                                                   | passive / unresponsive            |
| anxious / nervous                                                                                                          | shy                               |
| reluctant to participate in class discussions                                                                              | prefers to work alone             |
| self-conscious                                                                                                             | unduly quiet                      |
| <b>Personality – unsuitable attitude</b>                                                                                   |                                   |
| blasé                                                                                                                      | impatient                         |
| intolerant, “does not suffer fools gladly”                                                                                 | diffident                         |
| brusque                                                                                                                    | aloof                             |
| arrogant                                                                                                                   | casual                            |
| laconic                                                                                                                    | truculent                         |
| forceful, over-assertive                                                                                                   | over-confident                    |
| self-opinionated                                                                                                           | laid-back                         |
| ruthless, over-ambitious                                                                                                   |                                   |
| <b>Medical or social problems</b>                                                                                          |                                   |
| affected by family anxieties / troubles (eg divorce, bereavement)                                                          |                                   |
| difficulties adjusting to cultural change / new environment                                                                |                                   |
| dyslexia                                                                                                                   |                                   |
| eating disorder                                                                                                            |                                   |
| ME                                                                                                                         |                                   |
| “concerns over health”                                                                                                     |                                   |
| recurrent illness                                                                                                          |                                   |
| <b>Late decision to read Medicine</b>                                                                                      |                                   |
| little or no work experience                                                                                               |                                   |

The highlighted comments and codings were added to a database, and then a final rating given based on either the ‘majority view’ (if at least two of the reviewers gave the same rating) or the average of the three if they were all different. A final rating of 2 (moderate) or 3 (major) was then coded as a negative reference, whereas 0 (none) or 1(minor) was not.
