# Supplementary material
Source: PubMed Central journal article supplement (PMC4787859)
Supplement: yatj704460.ww3_default.pdf [file yatj704460.ww3_default.pdf]

### Appendix 3: Categories of misconduct and list of cases [posted as supplied by author]

The GMC provided standardised information on the types of professional misconduct found in the 'cases'. The categories and descriptions provided were as shown.

| GMC categories                          | Category descriptions                                                                                                                                                                                      |
|-----------------------------------------|------------------------------------------------------------------------------------------------------------------------------------------------------------------------------------------------------------|
| Sub standard clinical practice and care | Sub-standard treatment<br>Inappropriate/irresponsible prescribing<br>Relations with colleagues<br>Inadequate practice arrangements                                                                         |
| Dysfunctional conduct                   | Improper sexual/emotional relationship<br>Failure to report dysfunctional colleague                                                                                                                        |
| Dishonesty                              | False claims about effectiveness of treatment<br>Research misconduct<br>Financial fraud/deception<br>False claims to qualifications/experience<br>False certifications/false reporting                     |
| Dishonesty/criminality                  | Clinical drugs trials and research<br>Assault/breach of the peace<br>Murder/manslaughter<br>Assault/violence/breach of peace<br>Firearms offences<br>Controlled substances offences<br>Other/not specified |
| Sexual assault or indecency             | Indecent behaviour<br>Indecent assault                                                                                                                                                                     |
| Treatment                               | Irresponsible prescribing<br>Inadequate/inappropriate treatment<br>Medical reports and records                                                                                                             |
| Other complaints and enquiries          | Medical reports/records issues                                                                                                                                                                             |
| Other                                   | Not specified                                                                                                                                                                                              |
| Unclear/irrational                      | Unknown                                                                                                                                                                                                    |

The case closure reasons listed by the GMC were:

- Erasure
- Erasure with immediate suspension
- Suspension
- Suspension with immediate effect
- Admonished/reprimanded
- Conditional registration
- Existing conditions remain
- New conditions
- Case Review
- CR Case Created
- Suspension removed: no longer impaired
- Not applicable

These categories were collapsed into six simpler groups and used to code the outcomes in the database:

1. Erasure or Erasure with immediate suspension
2. Suspension or Suspension with immediate effect
3. Admonished/reprimanded
4. Conditional registration, New conditions, Existing conditions remain
5. Case Review, CR Case Created
6. Suspension removed: no longer impaired; not applicable
7. Not applicable

**Details of individual cases: misconduct categories and sanctions**

| <b>Study ID</b> | <b>Category of misconduct</b>                        | <b>Description of misconduct</b>              | <b>Case closure reason</b>             |
|-----------------|------------------------------------------------------|-----------------------------------------------|----------------------------------------|
| 282             | Dishonesty                                           | False certifications/false reporting          | Admonished/reprimanded                 |
| 296             | Dishonesty                                           | False claims to qualifications/experience     | Suspension                             |
| 121             | Dishonesty                                           | False claims to qualifications/experience     | Admonished/reprimanded                 |
| 231             | Dishonesty                                           | Research misconduct                           | Erasure                                |
| 61              | Dishonesty                                           | False claims about effectiveness of treatment | Case Review                            |
| 163             | Dishonesty                                           | Research misconduct                           | Suspension                             |
| 155             | Dishonesty                                           | Research misconduct                           | Case Review                            |
| 204             | Dishonesty / Criminality                             | Other                                         | Not Applicable (previous erasure)      |
| 171             | Dishonesty / Criminality                             | Controlled substances offences                | Case Review                            |
| 172             | Dishonesty / Criminality                             | Other                                         | New conditions                         |
| 191             | Dishonesty / Criminality                             | Assault/breach of the peace                   | Erasure with immediate suspension      |
| 192             | Dishonesty / Criminality                             | Other                                         | Erasure with immediate suspension      |
| 113             | Dishonesty / Criminality                             | Murder/manslaughter                           | Erasure with immediate suspension      |
| 202             | Dishonesty / Criminality                             |                                               | Erasure with immediate suspension      |
| 111             | Dishonesty / Criminality                             | Other                                         | Erasure                                |
| 108             | Dishonesty / Criminality                             |                                               | Case Review                            |
| 107             | Dishonesty / Criminality                             | Firearms offences                             | Erasure                                |
| 40              | Dishonesty / Criminality                             | Controlled substances offences                | Erasure                                |
| 18              | Dishonesty / Criminality                             |                                               | Erasure with immediate suspension      |
| 292             | Dishonesty / Criminality + Personal behaviour/health | Other                                         | Erasure with immediate suspension      |
| 241             | Dishonesty/criminality                               | Clinical drugs trials and research            | Conditional registration               |
| 213             | Dysfunctional conduct                                | Improper sexual/emotional relationship        | Erasure with immediate suspension      |
| 199             | Dysfunctional conduct                                | Improper sexual/emotional relationship        | Suspension with immediate effect       |
| 272             | Dysfunctional conduct                                |                                               | Case Review                            |
| 47              | Dysfunctional conduct                                | Improper sexual/emotional relationship        | Erasure                                |
| 258             | Dysfunctional conduct                                | Improper sexual/emotional relationship        | Suspension removed: no longer impaired |
| 24              | Dysfunctional conduct                                | Failure to report dysfunctional colleague     | Admonished/reprimanded                 |
| 132             | Other                                                | Other                                         | Admonished/reprimanded                 |
| 264             | Other                                                | Other                                         | Admonished/reprimanded                 |

Continued overleaf

| <b>Study ID</b> | <b>Category of misconduct</b>           | <b>Description of misconduct</b>        | <b>Case closure reason</b>        |
|-----------------|-----------------------------------------|-----------------------------------------|-----------------------------------|
| 179             | Other                                   | Other                                   | Admonished/reprimanded            |
| 32              | Other complaints and enquiries          | Medical reports/records issues          | Admonished/reprimanded            |
| 161             | Other complaints and enquiries          | Medical reports/records issues          | Conditional registration          |
| 50              | Sexual assault or indecency             | Indecent behaviour                      | Admonished/reprimanded            |
| 135             | Sexual assault or indecency             | Indecent assault                        | Erasure with immediate suspension |
| 71              | Sexual assault or indecency             | Indecent behaviour                      | Erasure with immediate suspension |
| 146             | Sub standard clinical practice and care | Inappropriate/irresponsible prescribing | Erasure with immediate suspension |
| 152             | Sub standard clinical practice and care | Inadequate practice arrangements        | Conditional registration          |
| 125             | Sub standard clinical practice and care | Sub-standard treatment                  | Erasure with immediate suspension |
| 289             | Sub standard clinical practice and care | Inappropriate/irresponsible prescribing | Admonished/reprimanded            |
| 279             | Sub standard clinical practice and care | Sub-standard treatment                  | Conditional registration          |
| 68              | Sub standard clinical practice and care | Inappropriate/irresponsible prescribing | Erasure with immediate suspension |
| 41              | Sub standard clinical practice and care | Sub-standard treatment                  | New conditions                    |
| 55              | Sub standard clinical practice and care | Inappropriate/irresponsible prescribing | Conditional registration          |
| 112             | Sub standard clinical practice and care | Relations with colleagues               | Admonished/reprimanded            |
| 136             | Sub standard clinical practice and care | Inappropriate/irresponsible prescribing | Admonished/reprimanded            |
| 116             | Sub standard clinical practice and care | Sub-standard treatment                  | Case Review                       |
| 269             | Sub standard clinical practice and care | Sub-standard treatment                  | Admonished/reprimanded            |
| 223             | Sub standard clinical practice and care | Sub-standard treatment                  | Case Review                       |
| 242             | Sub standard clinical practice and care | Inappropriate/irresponsible prescribing | Admonished/reprimanded            |
| 110             | Sub standard clinical practice and care | Sub-standard treatment                  | Erasure with immediate suspension |
| 218             | Sub standard clinical practice and care | Sub-standard treatment                  | Admonished/reprimanded            |
| 109             | Treatment                               | Consent issues                          | Admonished/reprimanded            |
| 250             | Treatment                               | Inadequate/inappropriate treatment      | Conditional registration          |
| 237             | Treatment                               | Inadequate/inappropriate treatment      | Admonished/reprimanded            |
| 14              | Treatment                               | Inadequate/inappropriate treatment      | New conditions                    |
| 214             | Treatment                               | Irresponsible prescribing               | Erasure                           |
| 181             | Treatment                               | Medical reports and records             | Conditional registration          |
| 30              | Treatment                               | Medical reports and records             | Admonished/reprimanded            |
| 147             | Unclear/irrational                      | Unknown                                 | Suspension                        |
